# Supplementary material for: One-Step Hydrothermal Synthesis, Thermochromic and Infrared Camouflage Properties of Vanadium Dioxide Nanorods
Source: MDPI journal article supplement (doi:10.3390/nano12193534), 2022-10-10
Supplement: s1 [file s1]

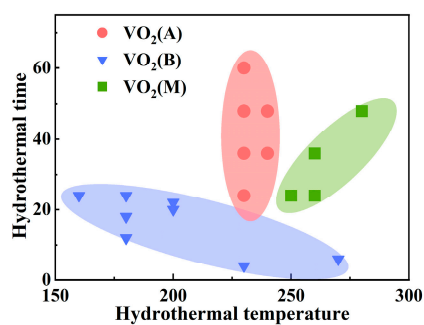

**Figure S1** . Hydrothermal product of VO<sub>2</sub> versus hydrothermal temperature and reaction time

**Table S1.** the crystallography information of VO<sub>2</sub> polymorphs.

| Polymorphs          | Unit cell parameters<br>a,b,c (Å) | $\beta(^{\circ})$ | Space group          |
|---------------------|-----------------------------------|-------------------|----------------------|
| VO <sub>2</sub> (B) | 12.054,3.693,6.424                | 106.96            | C2/m                 |
| VO <sub>2</sub> (A) | 8.450,8.450,7.678                 | 90                | P4 <sub>2</sub> /ncm |
| VO <sub>2</sub> (M) | 5.752,4.538,5.383                 | 122.64            | P2 <sub>1</sub> /c   |
| VO <sub>2</sub> (R) | 4.554,4.554,2.856                 | 90                | P4 <sub>2</sub> /mnm |
| VO <sub>2</sub> (D) | 4.597,5.684,4.913                 | 89.39             | P2/c                 |
| VO <sub>2</sub> (P) | 4.890,9.390,2.930                 | 90                | Pbnm                 |
